# Supplementary material
Source: PubMed Central journal article supplement (PMC4446879)
Supplement: ASN.2014060546_ASN2014060546SupplementaryData.pdf [file ASN.2014060546_ASN2014060546SupplementaryData.pdf]

**eTable 1.** Baseline characteristics of the Community Health Network (CHN) and Harborview Medical Center (HMC) subcohorts.

| Characteristics                       | CHN        |      | HMC        |      |
|---------------------------------------|------------|------|------------|------|
|                                       | n = 16,656 |      | n = 12,123 |      |
| <b>Demographics</b>                   |            |      |            |      |
| Age (years) (mean, sd)                | 58.7       | 13.7 | 62.4       | 14.7 |
| Male (n, %)                           | 7,780      | 46.7 | 6,123      | 50.5 |
| Race or ethnicity (n, %)              |            |      |            |      |
| Non-Hispanic White                    | 4,675      | 28.1 | 7,082      | 58.4 |
| Non-Hispanic Black                    | 3,468      | 20.8 | 1,462      | 12.1 |
| Hispanic                              | 3,106      | 18.7 | 360        | 3.0  |
| Asian                                 | 4,973      | 29.9 | 1,274      | 10.5 |
| Other race or ethnicity               | 434        | 2.6  | 1,945      | 16.0 |
| <b>Health insurance coverage</b>      |            |      |            |      |
| Uninsured (n, %)                      | 6,001      | 36.0 | 2,339      | 19.3 |
| Medicaid (n, %)                       | 3,968      | 23.8 | 2,292      | 18.9 |
| Medicare (n, %)                       | 6,522      | 39.2 | 4,010      | 33.1 |
| Private or commercial (n, %)          | 165        | 1.0  | 3,482      | 28.7 |
| <b>Comorbidities</b>                  |            |      |            |      |
| Diabetes (n, %)                       | 3,721      | 22.3 | 2,848      | 23.5 |
| Hypertension (n, %)                   | 7,857      | 47.2 | 5,668      | 46.8 |
| Cardiovascular disease (n, %)         | 3,162      | 19.0 | 4,785      | 39.5 |
| Substance abuse (n, %)                | 3,127      | 18.8 | 3,467      | 28.6 |
| Chronic viral disease (n, %)          | 3,978      | 23.9 | 1,941      | 16.0 |
| <b>Laboratory data</b>                |            |      |            |      |
| eGFR mL/min/1.73m <sup>2</sup> (n, %) |            |      |            |      |
| 45 - 59                               | 13,179     | 79.1 | 8,763      | 72.3 |
| 30 - 44                               | 2,380      | 14.3 | 2,349      | 19.4 |
| 15 - 29                               | 814        | 4.9  | 760        | 6.3  |
| <15                                   | 283        | 1.7  | 251        | 2.1  |
| Albumin (dipstick) categorical (n, %) |            |      |            |      |
| None or trace                         | 8,327      | 61.5 | 4,382      | 61.7 |
| 1+                                    | 2,603      | 19.2 | 1,272      | 17.9 |
| 2+                                    | 1,725      | 12.7 | 758        | 10.7 |
| ≥3+                                   | 885        | 6.5  | 696        | 9.8  |
| Albumin (g/dL) (mean, sd)             | 3.9        | 0.7  | 3.6        | 0.6  |
| Calcium (mg/dL) (mean, sd)            | 9.0        | 0.8  | 9.4        | 0.6  |
| Hemoglobin (g/dL) (mean, sd)          | 12.8       | 2.1  | 13.1       | 2.0  |
| Serum creatinine (mg/dL) (mean, sd)   | 1.5        | 1.1  | 1.51       | 1.1  |
| Cholesterol (mg/dL) (mean, sd)        | 195.4      | 53.7 | 196.3      | 54.4 |

Missing values in the CHN cohort were distributed as follows: dipstick proteinuria 18.7%, serum cholesterol 12.4%, serum albumin 1.3%, and hemoglobin 0.4%; and the distribution of missing values in the HMC cohort was: dipstick proteinuria 41.4%, serum cholesterol 19.0%, serum calcium 12.9%, hemoglobin 3.8% and serum albumin 2.7%.

**eTable 2A.** Estimates (standard errors) of prediction performance measures for models 1-4 based on the Community Health Network cohort (n = 11,065 and n = 5,591 in the training and validation subsets).

| <b>Year 1</b>   |                |                |                |                |
|-----------------|----------------|----------------|----------------|----------------|
|                 | <b>Model 1</b> | <b>Model 2</b> | <b>Model 3</b> | <b>Model 4</b> |
| <b>AUC</b>      | 0.92 (0.02)    | 0.95 (0.02)    | 0.95 (0.01)    | 0.95 (0.01)    |
| <b>PE(x10)</b>  | 0.08 (<0.01)   | 0.08 (0.01)    | 0.08 (0.01)    | 0.08 (0.01)    |
| <b>PCF(0.1)</b> | 0.83 (0.05)    | 0.86 (0.05)    | 0.83 (0.04)    | 0.84 (0.05)    |
| <b>PCF(0.2)</b> | 0.93 (0.05)    | 0.98 (0.04)    | 0.94 (0.04)    | 0.98 (0.04)    |
| <b>PNF(0.8)</b> | 0.08 (0.09)    | 0.07 (0.03)    | 0.09 (0.03)    | 0.07 (0.03)    |
| <b>PNF(0.9)</b> | 0.19 (0.12)    | 0.12 (0.07)    | 0.14 (0.07)    | 0.12 (0.07)    |

  

| <b>Year 3</b>   |                |                |                |                |
|-----------------|----------------|----------------|----------------|----------------|
|                 | <b>Model 1</b> | <b>Model 2</b> | <b>Model 3</b> | <b>Model 4</b> |
| <b>AUC</b>      | 0.86 (0.02)    | 0.93 (0.01)    | 0.93 (0.01)    | 0.93 (0.01)    |
| <b>PE(x10)</b>  | 0.25 (0.01)    | 0.22 (0.02)    | 0.22 (0.03)    | 0.22 (0.03)    |
| <b>PCF(0.1)</b> | 0.60 (0.03)    | 0.74 (0.03)    | 0.75 (0.03)    | 0.81 (0.03)    |
| <b>PCF(0.2)</b> | 0.77 (0.03)    | 0.91 (0.03)    | 0.91 (0.03)    | 0.93 (0.02)    |
| <b>PNF(0.8)</b> | 0.24 (0.05)    | 0.12 (0.03)    | 0.12 (0.02)    | 0.10 (0.02)    |
| <b>PNF(0.9)</b> | 0.35 (0.06)    | 0.17 (0.06)    | 0.19 (0.05)    | 0.17 (0.05)    |

  

| <b>Year 5</b>   |                |                |                |                |
|-----------------|----------------|----------------|----------------|----------------|
|                 | <b>Model 1</b> | <b>Model 2</b> | <b>Model 3</b> | <b>Model 4</b> |
| <b>AUC</b>      | 0.84 (0.02)    | 0.92 (0.01)    | 0.92 (0.01)    | 0.93 (0.01)    |
| <b>PE(x10)</b>  | 0.38 (0.02)    | 0.34 (0.04)    | 0.34 (0.05)    | 0.33 (0.05)    |
| <b>PCF(0.1)</b> | 0.54 (0.03)    | 0.68 (0.03)    | 0.69 (0.03)    | 0.73 (0.03)    |
| <b>PCF(0.2)</b> | 0.71 (0.03)    | 0.88 (0.02)    | 0.87 (0.02)    | 0.90 (0.02)    |
| <b>PNF(0.8)</b> | 0.28 (0.04)    | 0.14 (0.02)    | 0.14 (0.02)    | 0.13 (0.02)    |
| <b>PNF(0.9)</b> | 0.41 (0.04)    | 0.22 (0.05)    | 0.23 (0.05)    | 0.20 (0.05)    |

Model 1: adjusted for age, sex, race-ethnicity and eGFR

Model 2: model 1 covariates + dipstick proteinuria and an interaction between eGFR and dipstick proteinuria

Model 3: model 2 covariates + health insurance coverage, comorbidities (diabetes mellitus, CVD, hypertension, substance abuse and chronic viral disease)

Model 4: model 3 covariates + additional laboratory variables (albumin, calcium, hemoglobin and cholesterol)

AUC: area under the ROC curve;

PE(x10): prediction error multiplied by a factor of 10;

PCF(q): proportion of events captured if proportion  $q$  of the population at highest risk is followed;

PNF(p): proportion of the population at highest risk that needs to be followed to capture the proportion  $p$  of the events.

**eTable 2B.** Estimates (standard errors) of prediction performance measures for models 1-4 based on the Harborview Medical Center cohort (n = 8,029 and n = 4,094 in the training and validation subsets).

| <b>Year 1</b>   |                |                |                |                |
|-----------------|----------------|----------------|----------------|----------------|
|                 | <b>Model 1</b> | <b>Model 2</b> | <b>Model 3</b> | <b>Model 4</b> |
| <b>AUC</b>      | 0.94 (0.02)    | 0.96 (0.02)    | 0.96 (0.01)    | 0.97 (0.01)    |
| <b>PE(x10)</b>  | 0.12 (0.01)    | 0.11 (0.01)    | 0.11 (0.01)    | 0.11 (0.02)    |
| <b>PCF(0.1)</b> | 0.88 (0.05)    | 0.87 (0.05)    | 0.87 (0.05)    | 0.87 (0.04)    |
| <b>PCF(0.2)</b> | 0.93 (0.04)    | 0.95 (0.04)    | 0.95 (0.04)    | 0.97 (0.03)    |
| <b>PNF(0.8)</b> | 0.08 (0.06)    | 0.06 (0.03)    | 0.06 (0.03)    | 0.05 (0.03)    |
| <b>PNF(0.9)</b> | 0.13 (0.11)    | 0.13 (0.07)    | 0.16 (0.06)    | 0.13 (0.06)    |

  

| <b>Year 3</b>   |                |                |                |                |
|-----------------|----------------|----------------|----------------|----------------|
|                 | <b>Model 1</b> | <b>Model 2</b> | <b>Model 3</b> | <b>Model 4</b> |
| <b>AUC</b>      | 0.91 (0.02)    | 0.95 (0.01)    | 0.95 (0.01)    | 0.96 (0.01)    |
| <b>PE(x10)</b>  | 0.30 (0.04)    | 0.26 (0.04)    | 0.24 (0.04)    | 0.24 (0.05)    |
| <b>PCF(0.1)</b> | 0.72 (0.03)    | 0.83 (0.03)    | 0.81 (0.03)    | 0.82 (0.03)    |
| <b>PCF(0.2)</b> | 0.87 (0.03)    | 0.91 (0.03)    | 0.90 (0.03)    | 0.92 (0.03)    |
| <b>PNF(0.8)</b> | 0.14 (0.05)    | 0.09 (0.03)    | 0.10 (0.02)    | 0.09 (0.02)    |
| <b>PNF(0.9)</b> | 0.30 (0.08)    | 0.20 (0.06)    | 0.20 (0.05)    | 0.17 (0.05)    |

  

| <b>Year 5</b>   |                |                |                |                |
|-----------------|----------------|----------------|----------------|----------------|
|                 | <b>Model 1</b> | <b>Model 2</b> | <b>Model 3</b> | <b>Model 4</b> |
| <b>AUC</b>      | 0.89 (0.02)    | 0.93 (0.01)    | 0.94 (0.01)    | 0.94 (0.01)    |
| <b>PE(x10)</b>  | 0.66 (0.08)    | 0.56 (0.09)    | 0.55 (0.10)    | 0.54 (0.10)    |
| <b>PCF(0.1)</b> | 0.61 (0.03)    | 0.73 (0.03)    | 0.74 (0.03)    | 0.73 (0.03)    |
| <b>PCF(0.2)</b> | 0.80 (0.03)    | 0.87 (0.03)    | 0.86 (0.03)    | 0.89 (0.03)    |
| <b>PNF(0.8)</b> | 0.20 (0.05)    | 0.15 (0.03)    | 0.14 (0.02)    | 0.13 (0.02)    |
| <b>PNF(0.9)</b> | 0.30 (0.06)    | 0.22 (0.05)    | 0.24 (0.05)    | 0.23 (0.05)    |

Model 1: adjusted for age, sex, race-ethnicity and eGFR

Model 2: model 1 covariates + dipstick proteinuria and an interaction between eGFR and dipstick proteinuria

Model 3: model 2 covariates + health insurance coverage, comorbidities (diabetes mellitus, CVD, hypertension, substance abuse and chronic viral disease)

Model 4: model 3 covariates + additional laboratory variables (albumin, calcium, hemoglobin and cholesterol)

AUC: area under the ROC curve;

PE(x10): prediction error multiplied by a factor of 10;

PCF(q): proportion of events captured if proportion  $q$  of the population at highest risk is followed;

PNF(p): proportion of the population at highest risk that needs to be followed to capture the proportion  $p$  of the events.

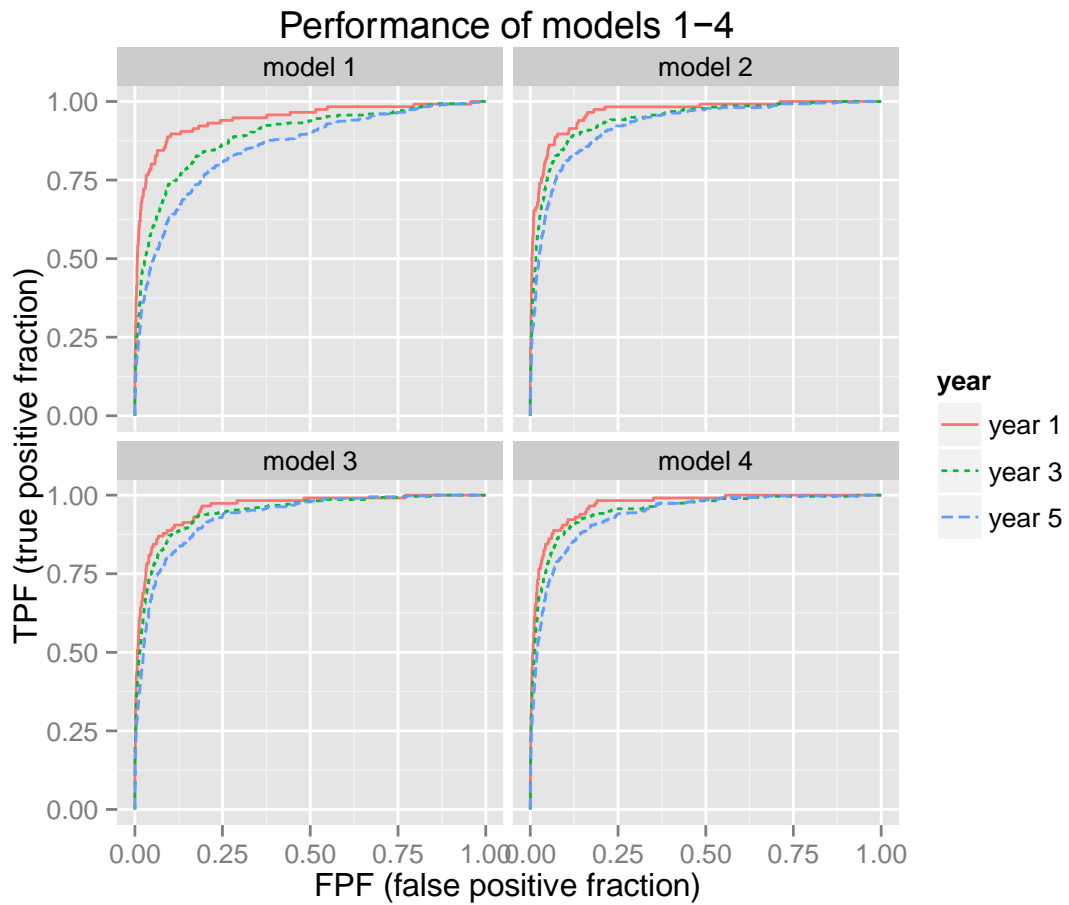

**eFigure 1.** The Receiver Operating Characteristics curve (ROC) summarizing the discrimination performance of models 1-4 for 1, 3, and 5-year time frames.

Model 2 showed a marked improvement in performance over model 1, especially for 3- and 5-year time frames. Models 3 and 4 offered minimal performance benefits over model 2. The performance of all models was highest for a 1-year time frame, and declined slightly over longer time frames.

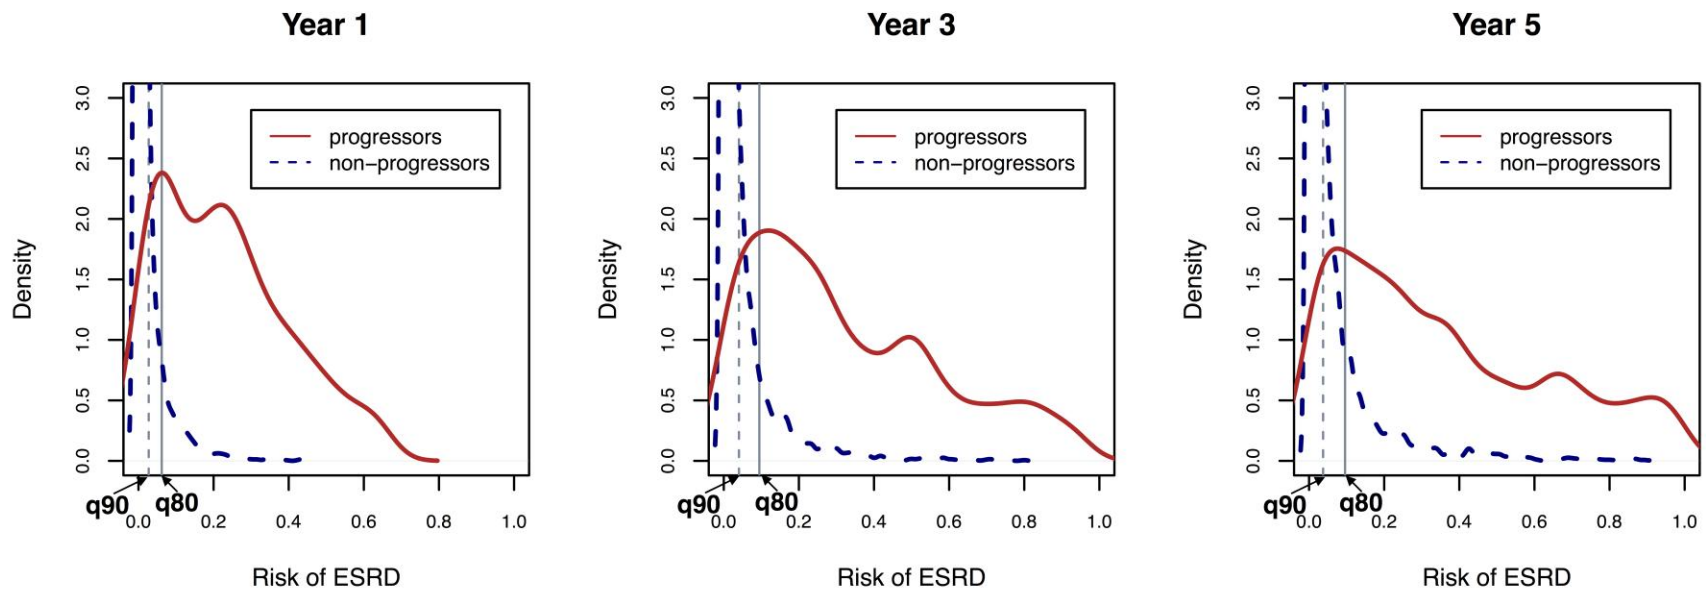

|                        | Year 1 |      |      | Year 3 |      |      | Year 5 |      |      |
|------------------------|--------|------|------|--------|------|------|--------|------|------|
|                        | N      | ≥q80 | ≥q90 | Total  | ≥q80 | ≥q90 | Total  | ≥q80 | ≥q90 |
| <b>Progressors</b>     | 116    | 93   | 104  | 282    | 225  | 253  | 391    | 313  | 352  |
| <b>Non-progressors</b> | 9120   | 364  | 824  | 8298   | 503  | 1166 | 6847   | 622  | 1380 |

**eFigure 2.** The distributions of predicted risk of ESRD among subjects who did not develop ESRD (non-progressors) in a given time frame (dashed blue line) and subjects who progressed to ESRD (progressors) in that time frame (solid red). We considered three time frames - 1 year, 3 and 5 years. 80% of the ESRD progressors are to the right of the vertical solid grey line (q80), and 90% of them are to the right of the vertical dashed grey line (q90). Predicted risk at the q80 threshold is 0.062, 0.095, 0.096 for years 1, 3, and 5, respectively, and for q90 it is 0.027, 0.040, 0.037 for years 1, 3, and 5, respectively. The risk predictions are based on model 2. The density for the non-progressors (dashed blue) is ten times the height shown in the figure, reaching 30 (not shown). The table below the figure summarizes the numbers of progressors and non-progressors with predicted risk above q80 and q90 for years 1, 3 and 5 from the validation subset (n=9,564).
